# Supplementary material
Source: MDPI journal article supplement (https://www.mdpi.com/2673-8015/2/3/15)
Supplement: s1 [file s1]

# Solvent Exchange around Aqueous Zn(II) from Ab Initio Molecular Dynamics Simulations

**Adrian Malinowski and Maciej Śmiechowski \***

Department of Physical Chemistry, Faculty of Chemistry, Gdańsk University of Technology, Narutowicza 11/12, 80-233 Gdańsk, Poland

\* Correspondence: [maciej.smiechowski@pg.edu.pl](mailto:maciej.smiechowski@pg.edu.pl)

## Supplementary Materials

**Figure S1.** Cartesian coordinates of the structures from Figure 4.

**Figure S1.** Cartesian coordinates of the structures from Figure 4.

19

Zn(H<sub>2</sub>O)<sub>6</sub>

|    |           |           |           |
|----|-----------|-----------|-----------|
| Zn | 0.253360  | 0.315261  | 0.189336  |
| O  | 1.503699  | -1.174274 | 1.060860  |
| H  | 1.875818  | -1.598386 | 0.820582  |
| H  | 1.824696  | -1.256016 | 1.601447  |
| O  | 0.738030  | 1.727175  | 1.752688  |
| H  | 0.759336  | 1.543563  | 2.496215  |
| H  | 0.972093  | 2.309795  | 1.765409  |
| O  | 1.921796  | 1.012758  | -0.959669 |
| H  | 2.635643  | 0.659472  | -0.899453 |
| H  | 2.076462  | 1.618935  | -1.188246 |
| O  | -0.993948 | 1.747723  | -0.800130 |
| H  | -1.389373 | 2.245410  | -0.480276 |
| H  | -1.014151 | 1.910229  | -1.446292 |
| O  | -0.303908 | -1.112573 | -1.370770 |
| H  | -0.920595 | -1.153212 | -1.685788 |
| H  | -0.157771 | -1.781664 | -1.407024 |
| O  | -1.403060 | -0.354817 | 1.395398  |
| H  | -2.037265 | -0.568862 | 1.190309  |
| H  | -1.494160 | -0.283755 | 2.059145  |

16

Zn(H<sub>2</sub>O)<sub>5</sub>

|    |           |           |           |
|----|-----------|-----------|-----------|
| Zn | 0.021474  | 0.036139  | 0.097448  |
| O  | -0.571963 | 0.975749  | 1.816309  |
| H  | -0.337417 | 0.544369  | 2.577913  |
| H  | -0.262026 | 1.888071  | 1.855534  |
| O  | 2.004876  | 0.610860  | 0.562729  |
| H  | 2.747457  | 0.261357  | 0.094228  |
| H  | 2.236097  | 0.934271  | 1.376621  |
| O  | 0.288970  | -1.960956 | 0.398454  |
| H  | 1.110370  | -2.192587 | 0.829633  |
| H  | 0.229907  | -2.539114 | -0.364855 |
| O  | 0.261298  | 0.711993  | -1.783415 |
| H  | 0.977653  | 0.944487  | -2.206436 |
| H  | -0.427984 | 0.559367  | -2.425548 |
| O  | -2.062170 | -0.282219 | -0.391947 |
| H  | -2.616915 | -0.590783 | 0.022138  |
| H  | -2.430990 | 0.494893  | -0.742004 |
